# Supplementary material for: Protective Effect of Surfactant Protein D in Pulmonary Vaccinia Virus Infection: Implication of A27 Viral Protein
Source: MDPI journal article supplement (doi:10.3390/v5030928), 2013-03-21

**Supplementary Data 1.** Effect of different defense lectins on VACV-WR infection. (A) VACV-WR was incubated with different collectins and related ficolin proteins (MBL, L-ficolin, M-ficolin, H-ficolin and RhSP-D) for 1 h. A549 cells were infected at a MOI of 0.0001 and virus replication was measured by a PFU assay. An asterisk indicates a statistically significant difference ( $p < 0.05$ ). (B) SPR analysis of the interaction of collectins and ficolins with immobilized A27. Upper panel, purified collectins (13.7 nM SP-D, 3.3  $\mu\text{g/mL}$  of MBL (10.8 nM), L-ficolin (8.1 nM), M-ficolin (8.5 nM) and H-ficolin (8.3 nM)) were injected over immobilized A27. Lower panel, purified surfactant proteins (13.7 nM SP-D, 90 nM hNCRD, 55 nM mutNCRD, 12  $\mu\text{g/mL}$  AP-SP-A and 5  $\mu\text{g/mL}$  RhSP-A) were injected over immobilized A27. Results are representative of two independent experiments.

**(A) Absence of inhibition of the lectins on VACV infection**

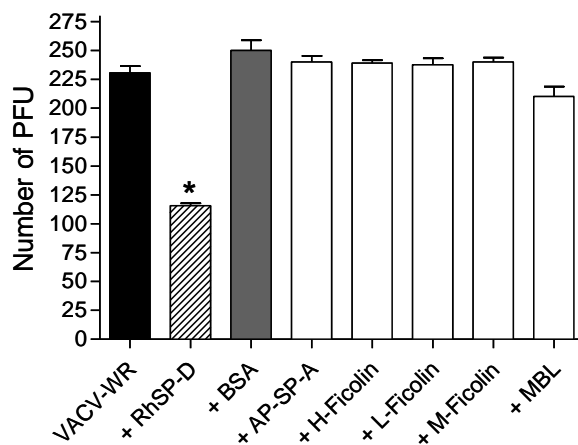

**(B) SPR analysis of the lectins interaction with immobilized A27**

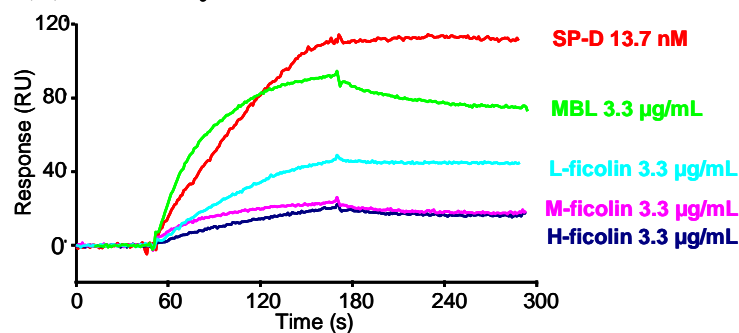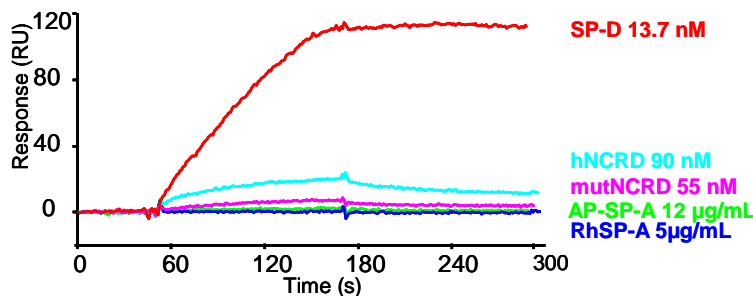

Supplement: s1 [file s1]
